# Supplementary material for: Engineering block co-polymer anion exchange membrane domains for highly efficient electrode-decoupled redox flow batteries
Source: Royal Society of Chemistry journal article supplement (doi:10.1039/d1se00543j), 2021-01-01
Supplement: d1se00543j1.pdf [file d1se00543j1.pdf]

Supporting Information

## **Engineering Block Co-polymer Anion Exchange Membrane Domains for Highly Efficient Electrode-Decoupled Redox Flow batteries**

Zhongyang Wang<sup>a,12</sup>, Shrihari Sankarasubramanian<sup>a,1</sup>, Jason Willey<sup>b</sup>, Hongbo Feng<sup>c</sup>, Hui Xu<sup>b</sup>,  
Vijay Ramani<sup>a,z</sup>

<sup>a</sup> Center for Solar Energy and Energy Storage and Department of Energy, Environmental and  
Chemical Engineering, Washington University in St. Louis, One Brookings Dr., St. Louis, MO  
63130, USA

<sup>b</sup> Giner Inc., Newton, MA 02466, USA

<sup>c</sup> Pritzker School of Molecular Engineering, The University of Chicago, 5640 South Ellis  
Avenue, Chicago, IL 60637, USA

<sup>z</sup> Corresponding Author's email: [ramani@wustl.edu](mailto:ramani@wustl.edu)

---

<sup>1</sup> These authors contributed equally.

<sup>2</sup> Present address: Pritzker School of Molecular Engineering, The University of Chicago, 5640  
South Ellis Avenue, Chicago, IL 60637, USA

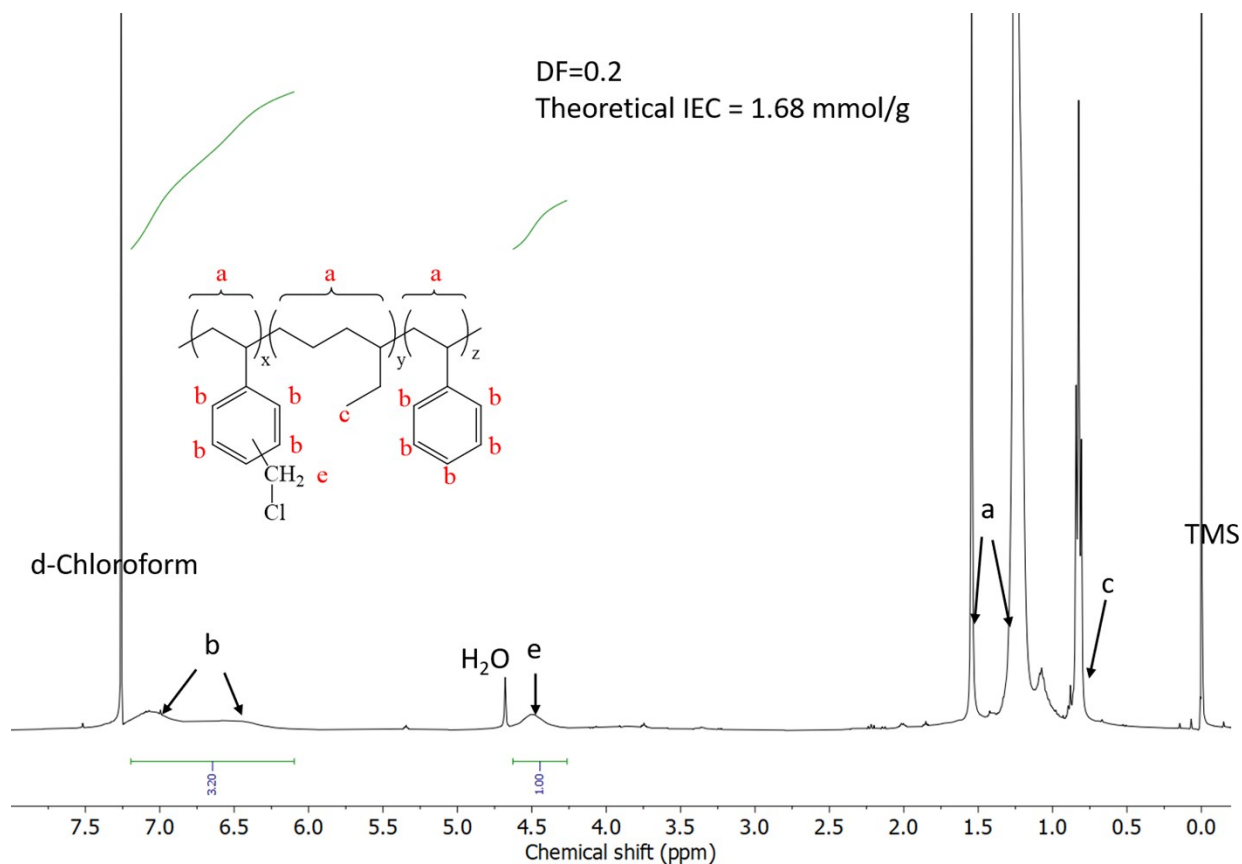

**Figure S1.**  $^1\text{H}$  NMR spectrum of CMSEBS30. Peaks a and c correspond to the protons on aliphatic backbone. Peaks b correspond to the protons the aromatic ring. The new peak e demonstrated that the chloromethylation reaction occurred in the SEBS. The DF value for CMSEBS30 was calculated by using the following equation:

$$\frac{\frac{\text{Area}(e)}{2}}{\text{Area}(b) + \frac{\text{Area}(e)}{2}} \times 0.3$$

$$\frac{\quad}{5}$$

The  $^1\text{H}$  NMR experiment was performed in chloroform-d with TMS, which was used as an internal standard for calibrating the chemical shift of  $^1\text{H}$ .

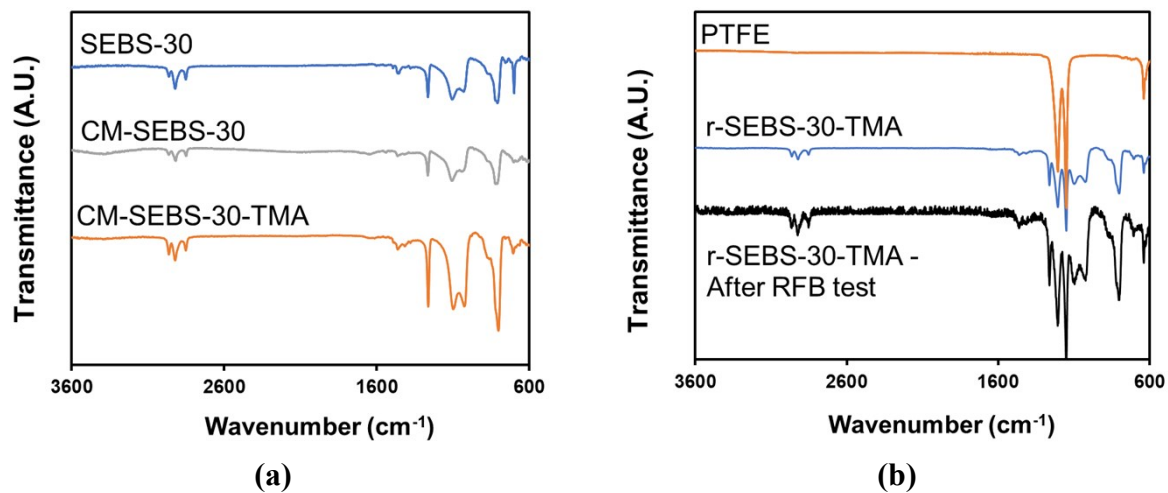

**Figure S2.** FTIR spectra of **(a)** SEBS polymer backbone, SEBS following chloromethylation reactions, CM-SEBS-TMA ionomer; **(b)** PTFE reinforcement, r-SEBS-TMA and the same ionomeric membrane separator after the RFB test.

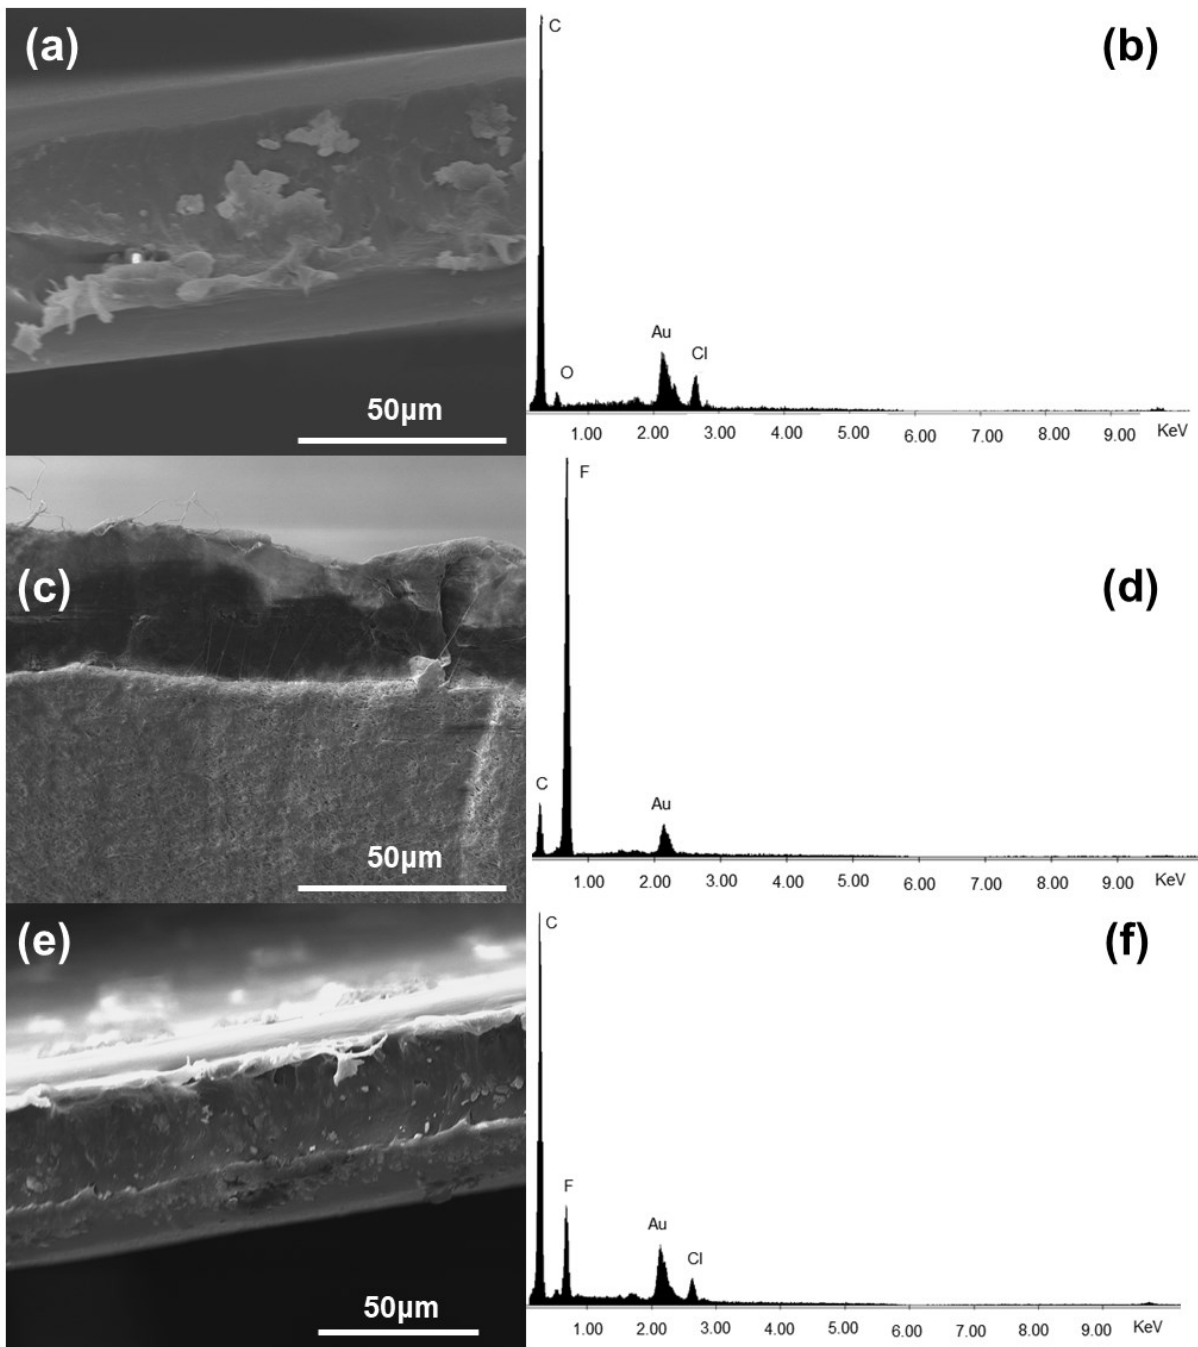

**Figure S3.** (a) cross-sectional SEM image of SEBS-TMA AEM, (b) spot EDAX spectra of SEBS-TMA AEM, (c) cross-sectional SEM image of ePTFE reinforcement, (d) spot EDAX spectra of ePTFE reinforcement, (e) cross-sectional SEM image of r-SEBS-TMA AEM, (f) spot EDAX spectra of r-SEBS-TMA AEM.

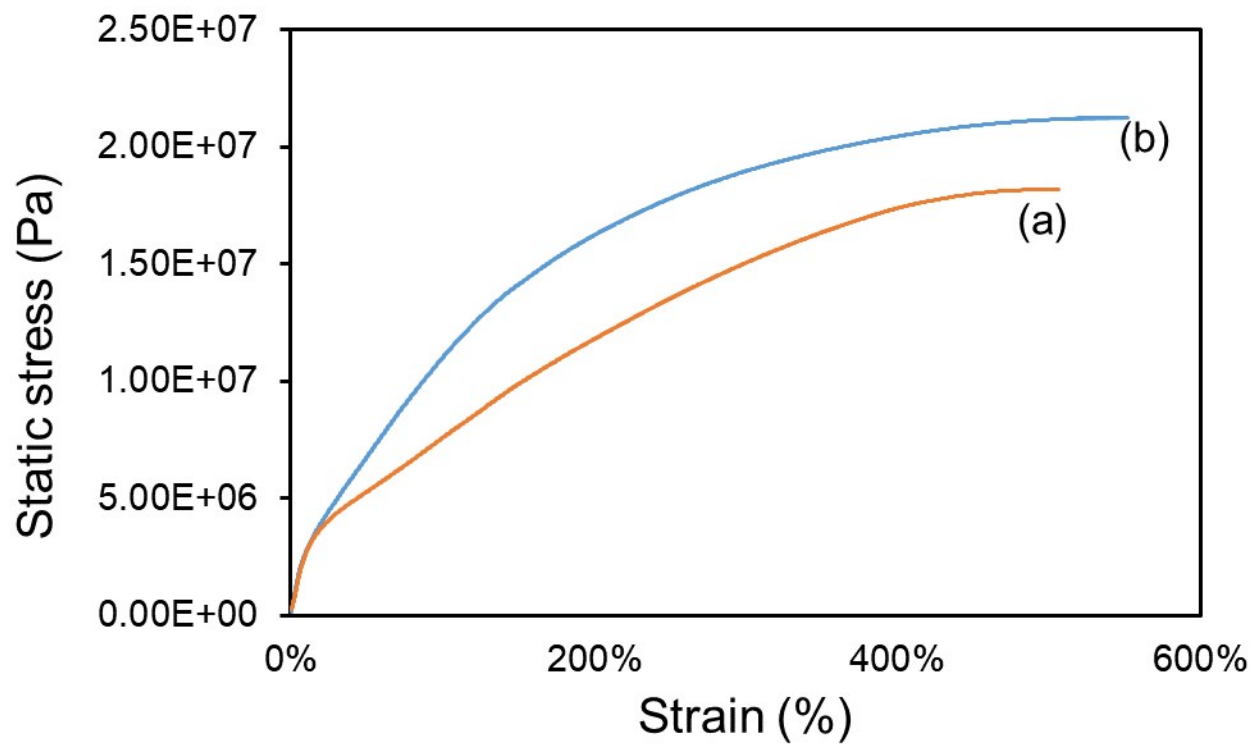

**Figure S4.** Stress-strain curve of (a) r-SEBS-TMA and (b) r-SEBS (before TMA functionalization).

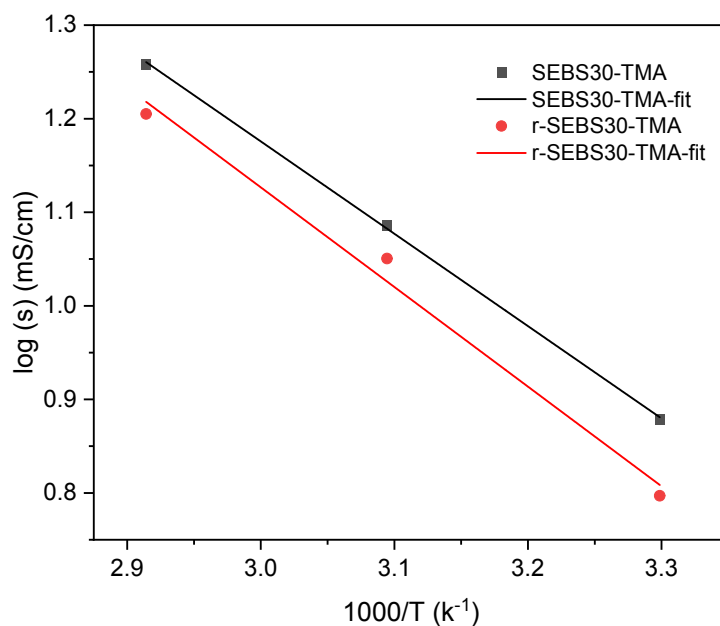

**Figure S5.** Arrhenius plot of  $\ln \sigma$  vs. inverse temperature for SEBS-based AEMs.

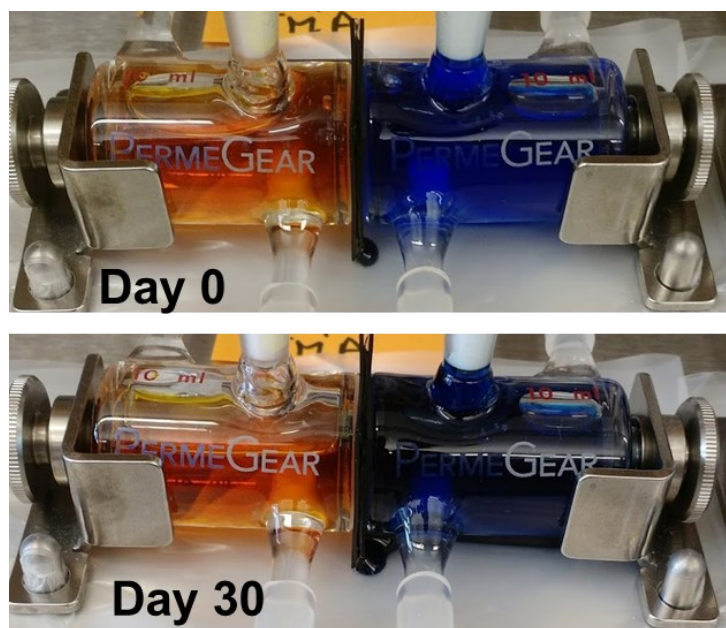

**Figure S6.** *Ex-situ*, temperature-controlled membrane cross-over experiments. The cerium electrolyte is on the left-hand chamber and vanadium electrolyte is on the right.

**Table S1.** Physical properties of ePTFE reinforcement

| <b>Property</b>                                                    |                                                                    |
|--------------------------------------------------------------------|--------------------------------------------------------------------|
| Thickness ( $\mu\text{m}$ )                                        | $25.4 \pm 3$                                                       |
| Gurley air flow ( $1\text{inch}^2$ at $4.88\text{inch}$ water) (s) | $25 \pm 2$                                                         |
| IPA bubble point ( $47\text{mm } \phi$ sample) (KPa)               | $345 \pm 28$                                                       |
| Ultimate tensile stress (MPa)                                      | $17 \pm 3$                                                         |
| Elongation at break (%)                                            | $339 \pm 42$                                                       |
| Modulus (MPa)                                                      | $14 \pm 1.4$                                                       |
| Ultimate tensile stress (after acid soak) (MPa)                    | $15 \pm 3$                                                         |
| Elongation at break (after acid soak) (%)                          | $260 \pm 50$                                                       |
| Modulus (after acid soak) (MPa)                                    | $13.6 \pm 4$                                                       |
| Thermal degradation onset ( $^{\circ}\text{C}$ )                   | $500 \pm 10$                                                       |
| Swelling ratio (%)                                                 | No appreciable swelling                                            |
| Water uptake (%)                                                   | No appreciable water uptake after blotting out the film adsorption |
